# Supplementary material for: Why Do Japan and South Korea Record Very Low Levels of Perceived Health Despite Having Very High Life Expectancies?
Source: PubMed Central journal article supplement — Yonsei Med J. 2019 Sep 16;60(10):998–1003. doi: 10.3349/ymj.2019.60.10.998 (PMC6753344; doi:10.3349/ymj.2019.60.10.998), 2019-09-16
Supplement: ymj-60-998-s001.pdf [file ymj-60-998-s001.pdf]

**Supplementary Table 1.** Descriptive Statistics for Life Expectancy, Self-Rated Health, and Number of Doctor Consultations Per Capita by Country

| Country         | Life expectancy (yr) | Good self-rated health* (%) | Fair+poor self-rated health <sup>†</sup> (%) | Poor self-rated health <sup>‡</sup> (%) | Number of doctor consultations per capita |
|-----------------|----------------------|-----------------------------|----------------------------------------------|-----------------------------------------|-------------------------------------------|
| Austria         | 81.3                 | 69.8                        | 30.2                                         | 8.8                                     | 6.6                                       |
| Belgium         | 81.1                 | 74.6                        | 25.4                                         | 9.4                                     | 6.8                                       |
| Czech Republic  | 78.7                 | 61.2                        | 38.8                                         | 11.1                                    | 11.1                                      |
| Denmark         | 80.8                 | 71.6                        | 28.4                                         | 7.6                                     | 4.4                                       |
| Estonia         | 77.7                 | 51.4                        | 48.5                                         | 15.7                                    | 6.4                                       |
| Finland         | 81.6                 | 69.8                        | 30.2                                         | 5.8                                     | 4.3                                       |
| France          | 82.4                 | 67.8                        | 32.2                                         | 7.8                                     | 6.3                                       |
| Germany         | 80.7                 | 64.5                        | 35.4                                         | 8.3                                     | 10.0                                      |
| Hungary         | 75.7                 | 56.3                        | 43.7                                         | 15.8                                    | 11.8                                      |
| Iceland         | 82.5                 | 76.3                        | 23.7                                         | 5.7                                     | 5.9                                       |
| Ireland         | 81.5                 | 82.3                        | 17.7                                         | 3.9                                     | 5.7                                       |
| Italy           | 82.6                 | 65.6                        | 34.4                                         | 12.4                                    | 6.8                                       |
| Japan           | 83.9                 | 35.4                        | 63.6                                         | 14.5                                    | 12.7                                      |
| Korea           | 82.1                 | 32.5                        | 67.5                                         | 17.6                                    | 16.0                                      |
| Latvia          | 74.6                 | 46.2                        | 53.8                                         | 16.3                                    | 5.9                                       |
| Luxembourg      | 82.4                 | 70.4                        | 29.6                                         | 8.7                                     | 5.8                                       |
| Netherlands     | 81.6                 | 76.2                        | 23.7                                         | 5.2                                     | 8.2                                       |
| Norway          | 82.4                 | 78.3                        | 21.7                                         | 6.4                                     | 4.3                                       |
| Poland          | 77.6                 | 57.8                        | 42.2                                         | 14.3                                    | 7.4                                       |
| Portugal        | 81.2                 | 46.4                        | 53.6                                         | 18.0                                    | 4.1                                       |
| Slovak Republic | 76.7                 | 65.9                        | 34.1                                         | 12.3                                    | 11.4                                      |
| Slovenia        | 80.9                 | 64.8                        | 35.2                                         | 11.6                                    | 6.8                                       |
| Spain           | 83.0                 | 72.4                        | 27.7                                         | 7.5                                     | 7.6                                       |
| Sweden          | 82.3                 | 79.7                        | 20.3                                         | 3.8                                     | 2.9                                       |
| Switzerland     | 83.0                 | 79.3                        | 20.7                                         | 3.8                                     | 3.9                                       |
| Turkey          | 78.0                 | 66.4                        | 33.6                                         | 12.0                                    | 8.4                                       |

Organization for Economic Co-operation and Development (OECD) countries with the same question on self-rated health.

\*Good or very good; <sup>†</sup>Fair, poor, or very poor; <sup>‡</sup>Poor or very poor.
