# Supplementary material for: Why Do Japan and South Korea Record Very Low Levels of Perceived Health Despite Having Very High Life Expectancies?
Source: PubMed Central journal article supplement — Yonsei Med J. 2019 Sep 16;60(10):998–1003. doi: 10.3349/ymj.2019.60.10.998 (PMC6753344; doi:10.3349/ymj.2019.60.10.998), 2019-09-16
Supplement: ymj-60-998-s002.pdf [file ymj-60-998-s002.pdf]

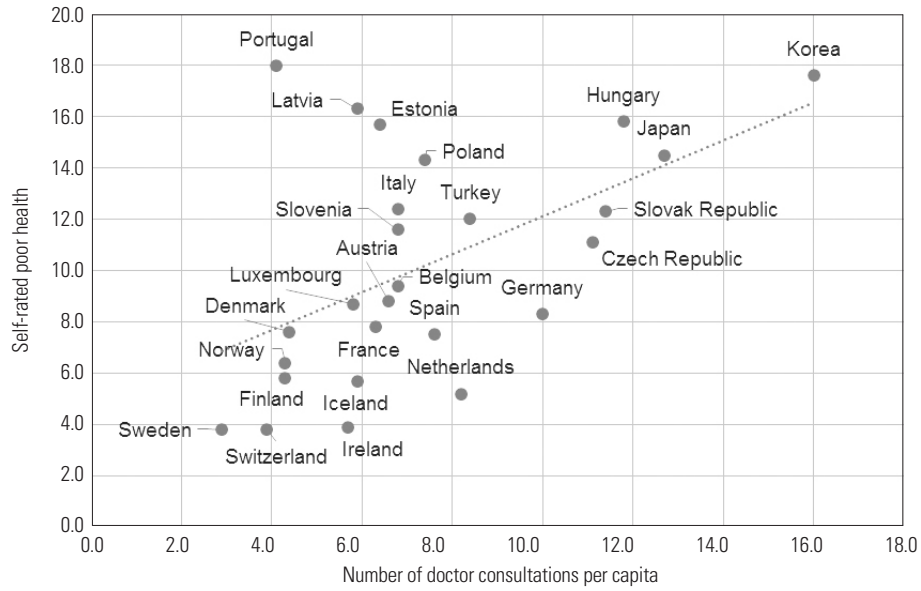

**Supplementary Fig. 1.** Number of annual doctor consultations per capita and poor self-rated health in 2015 or the nearest year. Correlation coefficient=0.521 ( $p=0.006$ ). When the three outliers (Portugal, Latvia, and Estonia) in the relationship were excluded, the correlation coefficient became 0.799 ( $p<0.001$ ).
