# Supplementary material for: Why Do Japan and South Korea Record Very Low Levels of Perceived Health Despite Having Very High Life Expectancies?
Source: PubMed Central journal article supplement — Yonsei Med J. 2019 Sep 16;60(10):998–1003. doi: 10.3349/ymj.2019.60.10.998 (PMC6753344; doi:10.3349/ymj.2019.60.10.998), 2019-09-16
Supplement: ymj-60-998-s003.pdf [file ymj-60-998-s003.pdf]

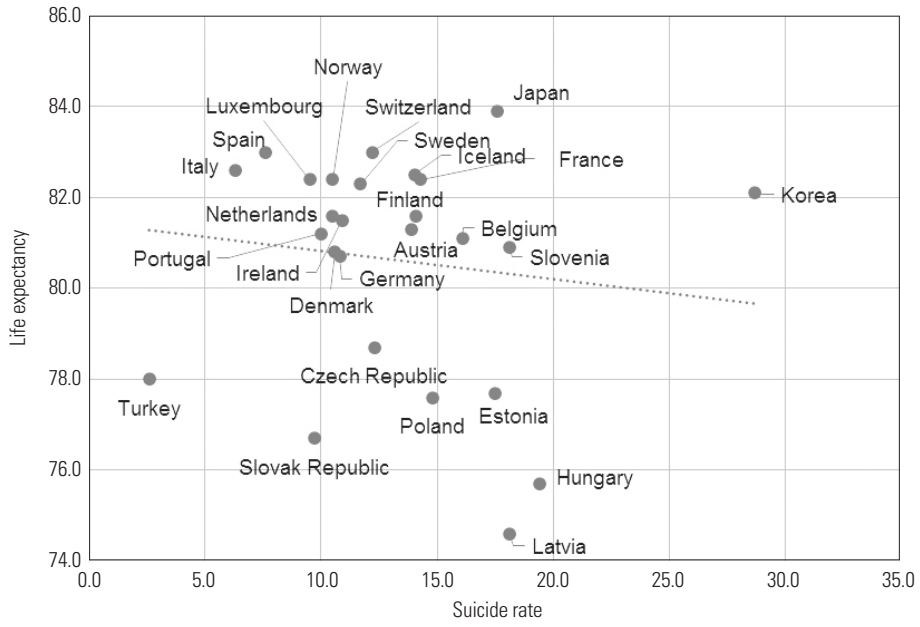

**Supplementary Fig. 2.** Suicide rate and life expectancy in 2015 or the nearest year. Correlation coefficient=-0.127 ( $p=0.536$ ).
